# Supplementary material for: Role of PCNA and RFC in promoting Mus81-complex activity
Source: PubMed Central journal article supplement (PMC5625722; doi:10.1186/s12915-017-0429-8), 2017-10-02

## Supplementary Figure 5

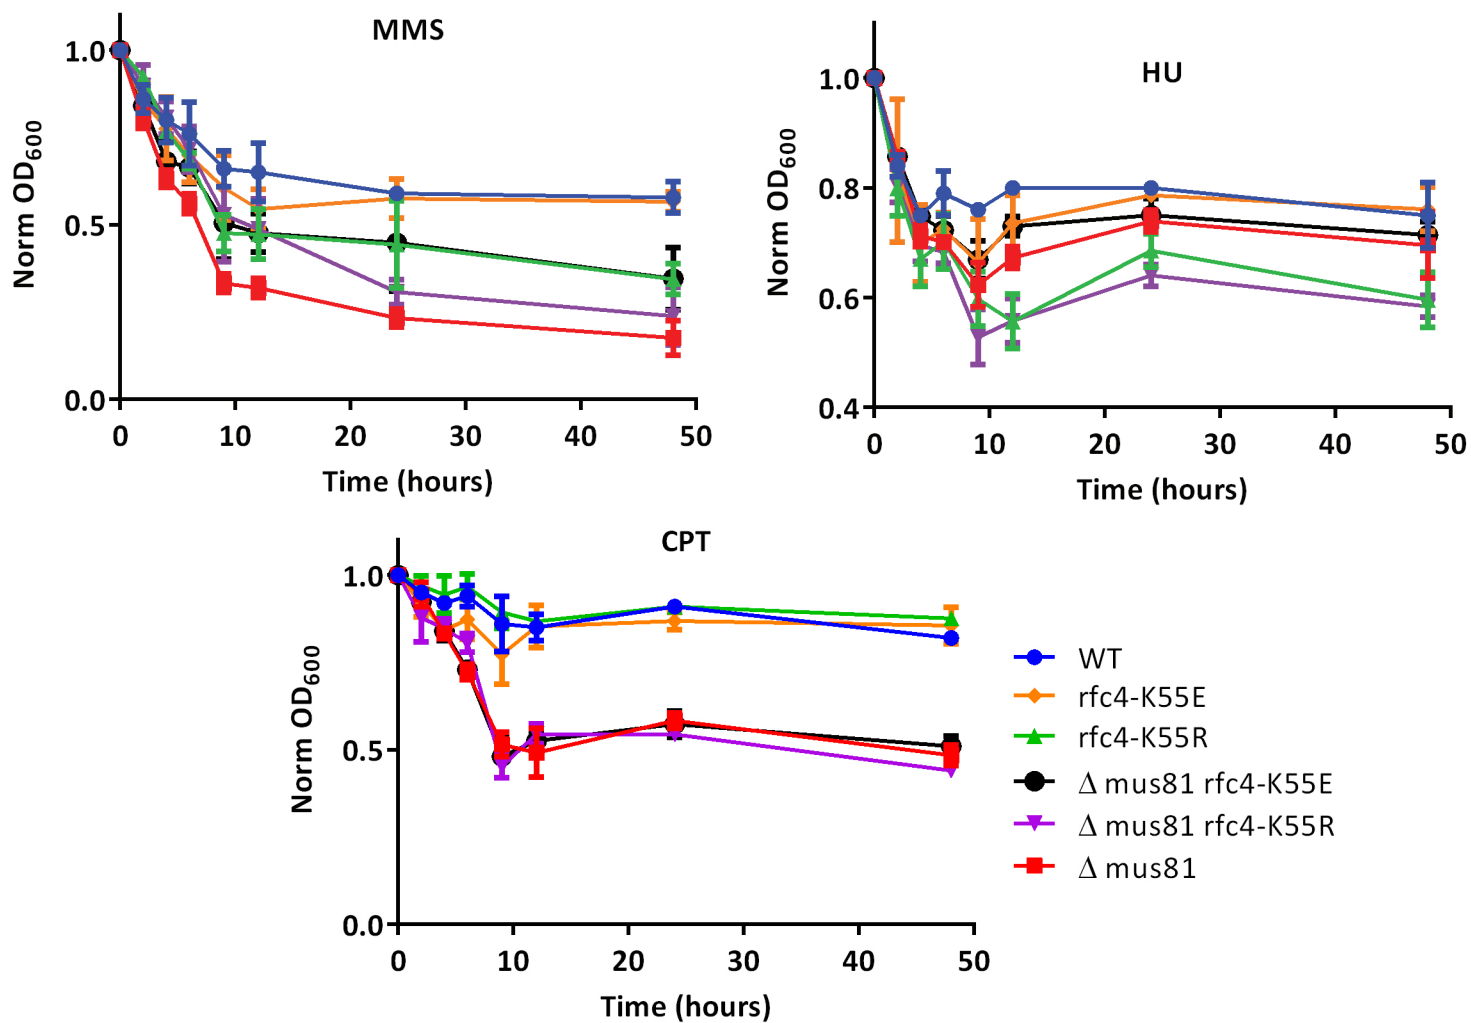

Supplement: 12915_2017_429_MOESM7_ESM.pdf [file 12915_2017_429_MOESM7_ESM.pdf]
